# Supplementary material for: Sodium Alginate Modified Platinum Nanozymes With Highly Efficient and Robust Oxidase-Like Activity for Antioxidant Capacity and Analysis of Proanthocyanidins
Source: Front Chem. 2020 Aug 5;8:654. doi: 10.3389/fchem.2020.00654 (PMC7419988; doi:10.3389/fchem.2020.00654)
Supplement: Supplementary file 1 [file Table_1.DOCX]

**SUPPLEMENTARY MATERIAL**

**Sodium Alginate Modified Platinum Nanozymes with Highly Efficient and Robust Oxidase-Like Activity for Antioxidant Capacity and Analysis of Proanthocyanidins**

Shao-Bin He,a Liu Yang,a Xiu-Ling Lin,a Hua-Ping Peng,a Zhen Lin,a Hao-Hua Deng,a* Wei Chen,a* Guo-Lin Hongb*

a Fujian Key Laboratory of Drug Target Discovery and Structural and Functional Research, School of Pharmacy, Fujian Medical University, Fuzhou 350004, China

b Department of Laboratory Medicine, The First Affiliated Hospital of Xiamen University, Xiamen 361005, China

* Corresponding author. Tel./fax: +86 591 22862016.

E-mail address: chenandhu@163.com (W. Chen), DHH8908@163.com (H-H Deng) , 18860089899@139.com (G-L Hong).

**EXPERIMENTAL PART**

**Materials and Reagents**

SA was bought from Jingchun Reagent Co., Ltd. (Shanghai, China). NaBH4, H2PtCl6, TMB, o-phenylenediamine (OPD), pyrogallol, 2,2’-azino-bis(3-ethylben- zothiazoline-6-sulfonic acid) diammonium salt (ABTS), 4-aminoantipyrine (4-AAP) and N-ethyl-N-(3-sulfopropyl)-3-methylaniline sodium salt (TOPS) were purchased from Aladdin Reagent Co. Ltd (Shanghai, China). [Ascorbic](D:/Youdao/Dict/8.5.1.0/resultui/html/index.html#/javascript:;) [acid](D:/Youdao/Dict/8.5.1.0/resultui/html/index.html#/javascript:;), Na2HPO4⋅12H2O, NaH2PO4⋅2H2O, H3PO4, and H2SO4 were obtained from Sinopharm Chemical Reagent Co., Ltd. (Shanghai, China). The OPC was bought from Yuanye Biotechnology Co., Ltd. (Shanghai, China).

**Apparatus and Characterization**

The ultraviolet-visible (UV-vis) absorption spectra were recorded using a UV-2450 UV-vis spectrophotometer (Shimadzu Corporation, Kyoto, Japan). Transmission electron microscope (TEM) images were collected with a JEM-2100 TEM (JEOL, Japan). X-ray photoelectron spectroscopy (XPS) was performed on an ESCALAB 250XI electron spectrometer (Thermo Fisher Scientific Inc., USA). Infrared (IR) spectra were measured at wavenumbers of 400–4000 cm-1 using a Nicolet Avatar 360 Fourier transform (FT)-IR spectrophotometer (Thermo Fisher Scientific Inc., USA). X-ray diffraction (XRD) patterns were recorded with a Bruker D8 Advance diffractometer (Germany). Electrochemical measurements were conducted with an electrochemical workstation (CHI660C, Shanghai Chenhua Device Company, China).

**Oxidase-Like Activity**

50 μL of TMB (3 mM) and 30 μL of SA-PtNPs (7.803 mg/L) were added into 920 μL of PB buffer (pH=4.5, 50 mM). Then, the mixture was incubated in 37 °C bath for 5 min. Subsequently, 200 μL of H2SO4 (2 M) was introduced to the reaction as stop buffer. Finally, the solution was transferred to a quartz cell for measurement at 450 nm.

20 μL of OPD (0.1 M) and 30 μL of SA-PtNPs (7.803 mg/L) were added into 950 μL of PB buffer. Then, the mixture was incubated in 37 °C bath for 5 min. Subsequently, the solution was transferred to a quartz cell for measurement.

20 μL of pyrogallol (0.1 M) and 30 μL of SA-PtNPs (7.803 mg/L) were added into 950 μL of PB buffer. Then, the mixture was incubated in 37 °C bath for 5 min. Subsequently, the solution was transferred to a quartz cell for measurement.

20 μL of ABTS (0.1 M) and 30 μL of SA-PtNPs (7.803 mg/L) were added into 950 μL of PB buffer. Then, the mixture was incubated in 37 °C bath for 5 min. Subsequently, the solution was transferred to a quartz cell for measurement.

10 μL of 4-AAP (0.1 M), 10 μL of TOPS (20 mM) and 30 μL of SA-PtNPs (7.803 mg/L) were added into 950 μL of PB buffer. Then, the mixture was incubated in 37 °C bath for 5 min. Subsequently, the solution was transferred to a quartz cell for measurement.

**Oxygen Reduction Reaction**

Pt wire was used as the counter electrode, and Ag/AgCl (KCl saturation) was the reference electrode. An aqueous solution of 50 μL of SA-PtNPs was dropped on a carbon screen-printed electrode. On this basis, the SA-PtNPs-modified electrode was air-dried at room temperature for 1 h. Subsequently, 1 μL of 0.5% Nafion solution was deposited on each electrode. Prior to each electrochemical test, the electrolyte solution (0.1 M KOH) was bubbled with N2 or O2 for 20 min. Cyclic voltammetry was performed at a scan rate of 50 mV s-1 over a potential range of −1.0 to 0.0 V.

**Extraction and Purification of OPC**

The grape seeds were first ground and pulverized, and then extracted with a Soxhlet extractor (using petroleum ether as a solvent, refluxing 8 times per hour, and extracting for 12 h, until the petroleum ether was evaporated and used). Then 60% ethanol was used as a solvent (the ratio of material to liquid was 1:7) and leached three times for 30 minutes in a 48.6°C water bath rotary shaker. After cooling, centrifuge at 4000 r/m in for 20 min, and combine the supernatant to obtain a crude extract. The crude extract was concentrated in vacuo using a rotary evaporator at 40°C under a vacuum of 0.095 MP. The concentrate was applied to a well-treated macroporous resin chromatography column and eluted with water and 20%, 40%, 60%, 80% ethanol, respectively. Thereafter, the eluate was separately concentrated in a vacuum and dried. The dried product was dissolved in a small amount of 75% acetone, mixed with a small amount of polyamide powder, and then dry-coated, and eluted with an acetone:water = 3:1 eluent at a rate of 2 mL/min. A partial collector was used to collect one tube every 2 min. Thereafter, the fraction of the eluate containing OPC was combined, concentrated under vacuum and dried to obtain the OPC extract.

**Antioxidant Capacity Evaluation**

50 μL of samples (7.625 g/L), 50 μL of TMB (3 mM) and 30 μL of SA-PtNPs (15.61 mg/L) were added into 870 μL of phosphate buffer (pH=4.5, 50 mM). The mixture was then incubated for 5 min at 37 °C. Subsequently, 200 μL of H2SO4 (2 M) was introduced to the reaction as a stop buffer. Finally, the solution was transferred to a quartz cell for measurement at 450 nm. The concentration of OPC (C1) was calculated to be 0.0035 mM by the linear equation (ΔA450=1.326lgCOPC+3.4538).

50 μL of ascorbic acid (20 mM), 50 μL of TMB (3 mM) and 30 μL of SA-PtNPs (15.61 mg/L) were added into 870 μL of phosphate buffer (pH=4.5, 50 mM). The mixture was then incubated for 5 min at 37 °C. Subsequently, 200 μL of H2SO4 (2 M) was introduced to the reaction as a stop buffer. Finally, the solution was transferred to a quartz cell for measurement at 450 nm. A concentration (C2) was calculated to be 0.0032 mM by the linear equation (ΔA450=1.326lgCOPC+3.4538).

The inhibitory effect of 1 mM AA on the SA-PtNPs-TMB system is defined as 1 U.

The antioxidant capacity of OPC = (C1 / C2 ) / m= (0.0035/0.0032 U) / 7.625=2.85 U/mg.

**The calculation of LOD**

The experiment of blank group was repeated to determine the fluctuation range of blank value. Then, ΔA0 is calculated. (ΔA0=A0’-A0, where A0'and A0 are the absorbance of the reaction product at 450 nm when OPC is absent, A0 was measured when establishing the working curve). Further, calculate the standard deviation of ΔA0 (σ = 0.00251). Finally, 3 times of the standard deviation (i.e. 3σ = 0.00753) is substituted into the linear equation (ΔA450 =1.1791 lgCOPC + 3.1941). Then, the LOD was calculated to be 0.002 mM by the linear equation (LOD = 10^[(3σ -3.1941)/1.1791]=0.002 mM ).


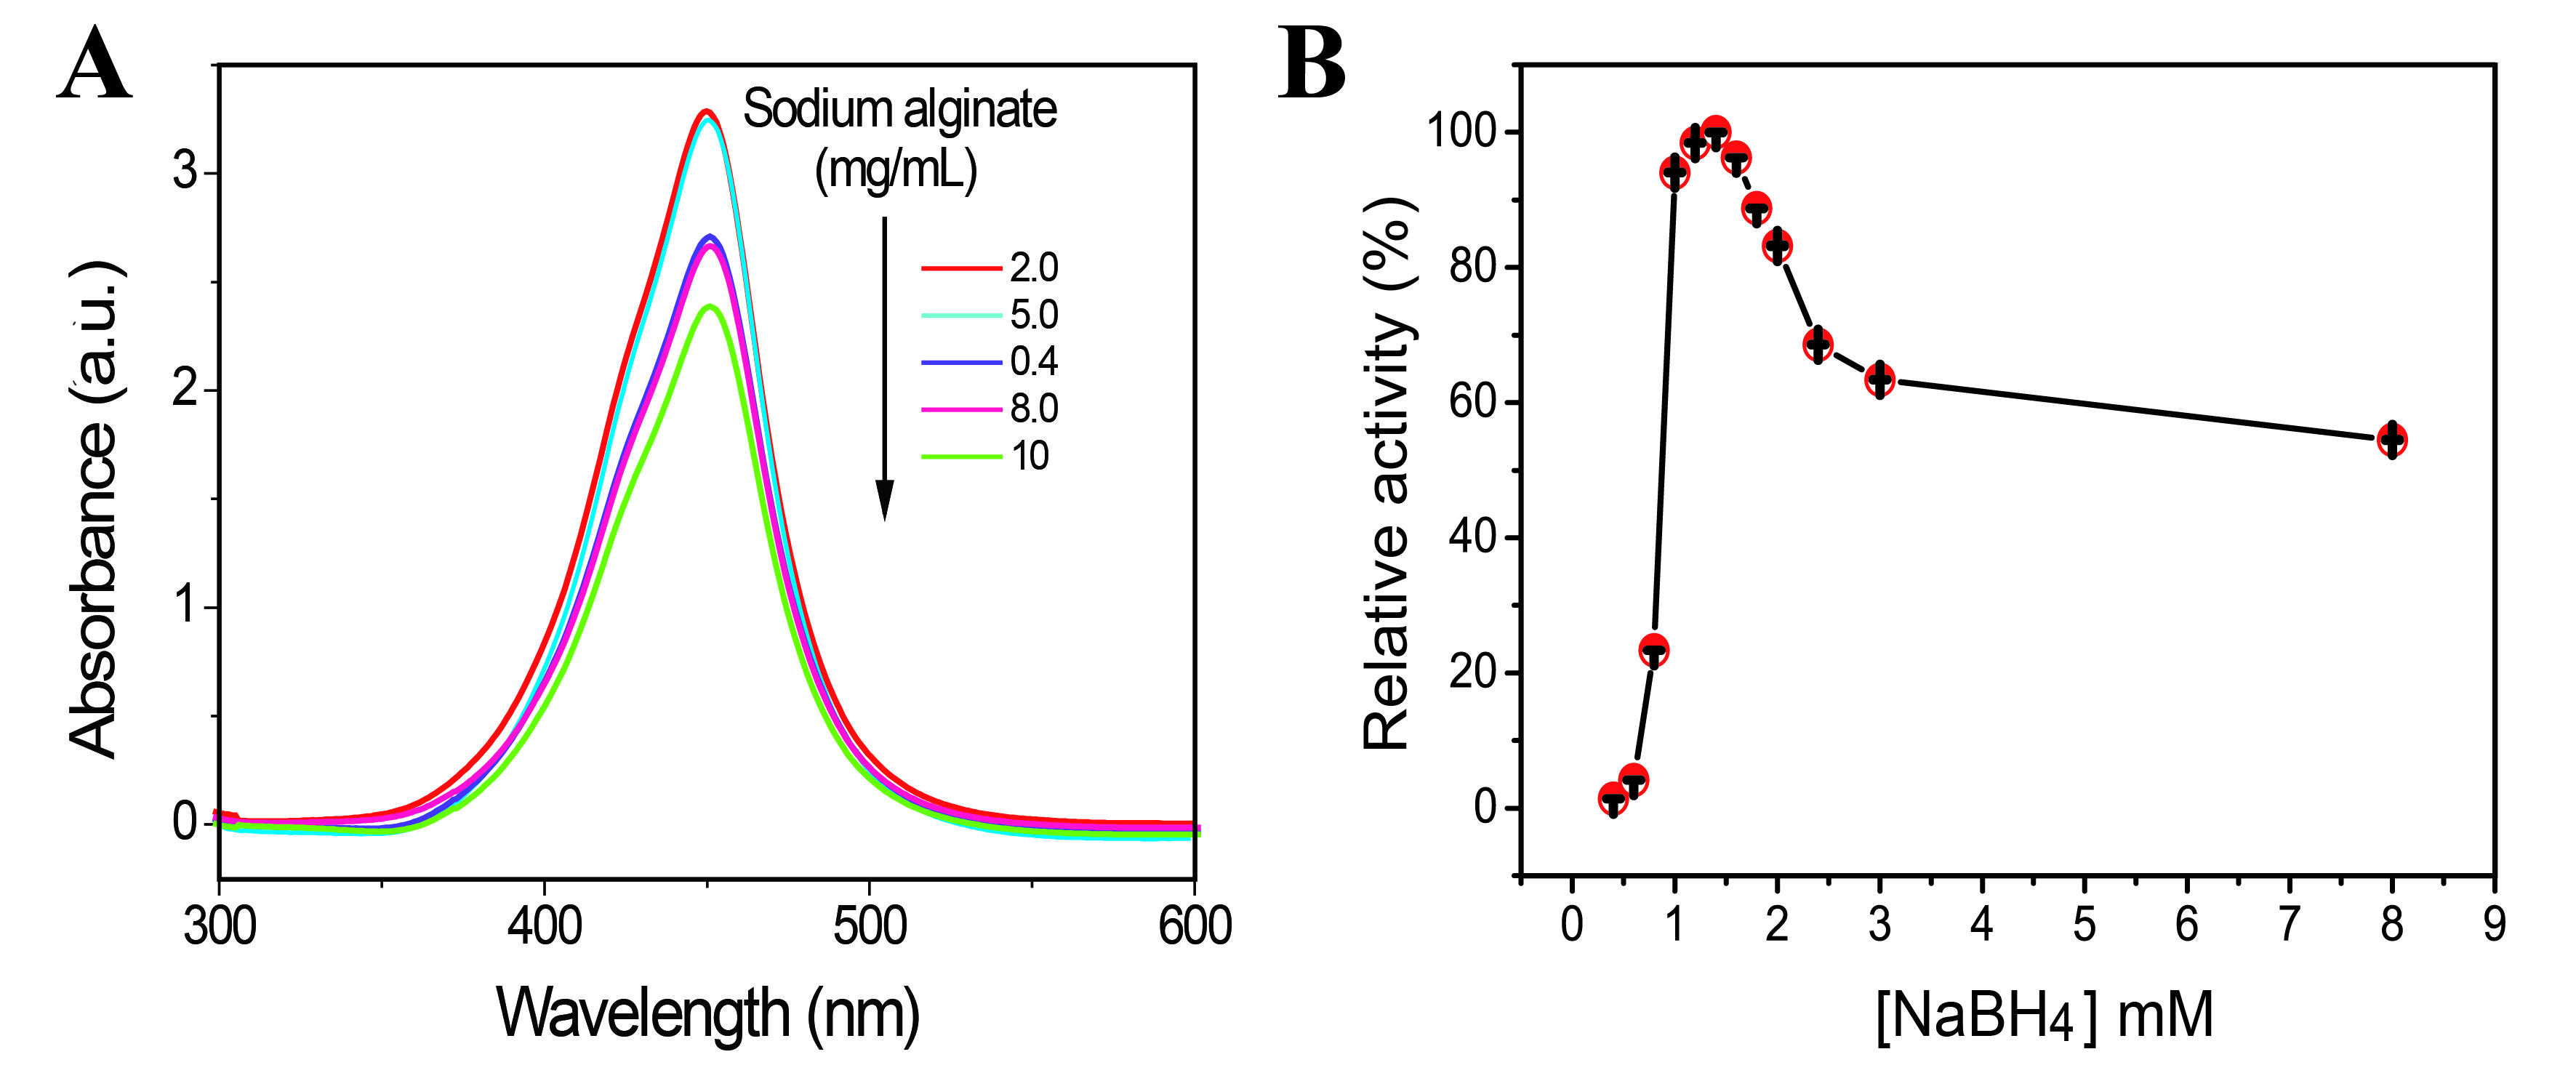


**SUPPLEMENTARY FIGURE S1. |** Effects of SA **(A)** and NaBH4 **(B)** on the catalytic activity of SA-PtNPs. (50 μL of 3 mM TMB and 17.5 μL of SA-PtNPs (78.03 mg/L) were added into 932.5 μL of PB buffer (pH=4.5, 50 mM). This solution was incubated in a 37 °C bath for 5 min. Subsequently, 200 μL of 2M H2SO4 was introduced to terminate the reaction. Finally, the mixture was transferred into a quartz cell to measure the absorbance at 450 nm.)


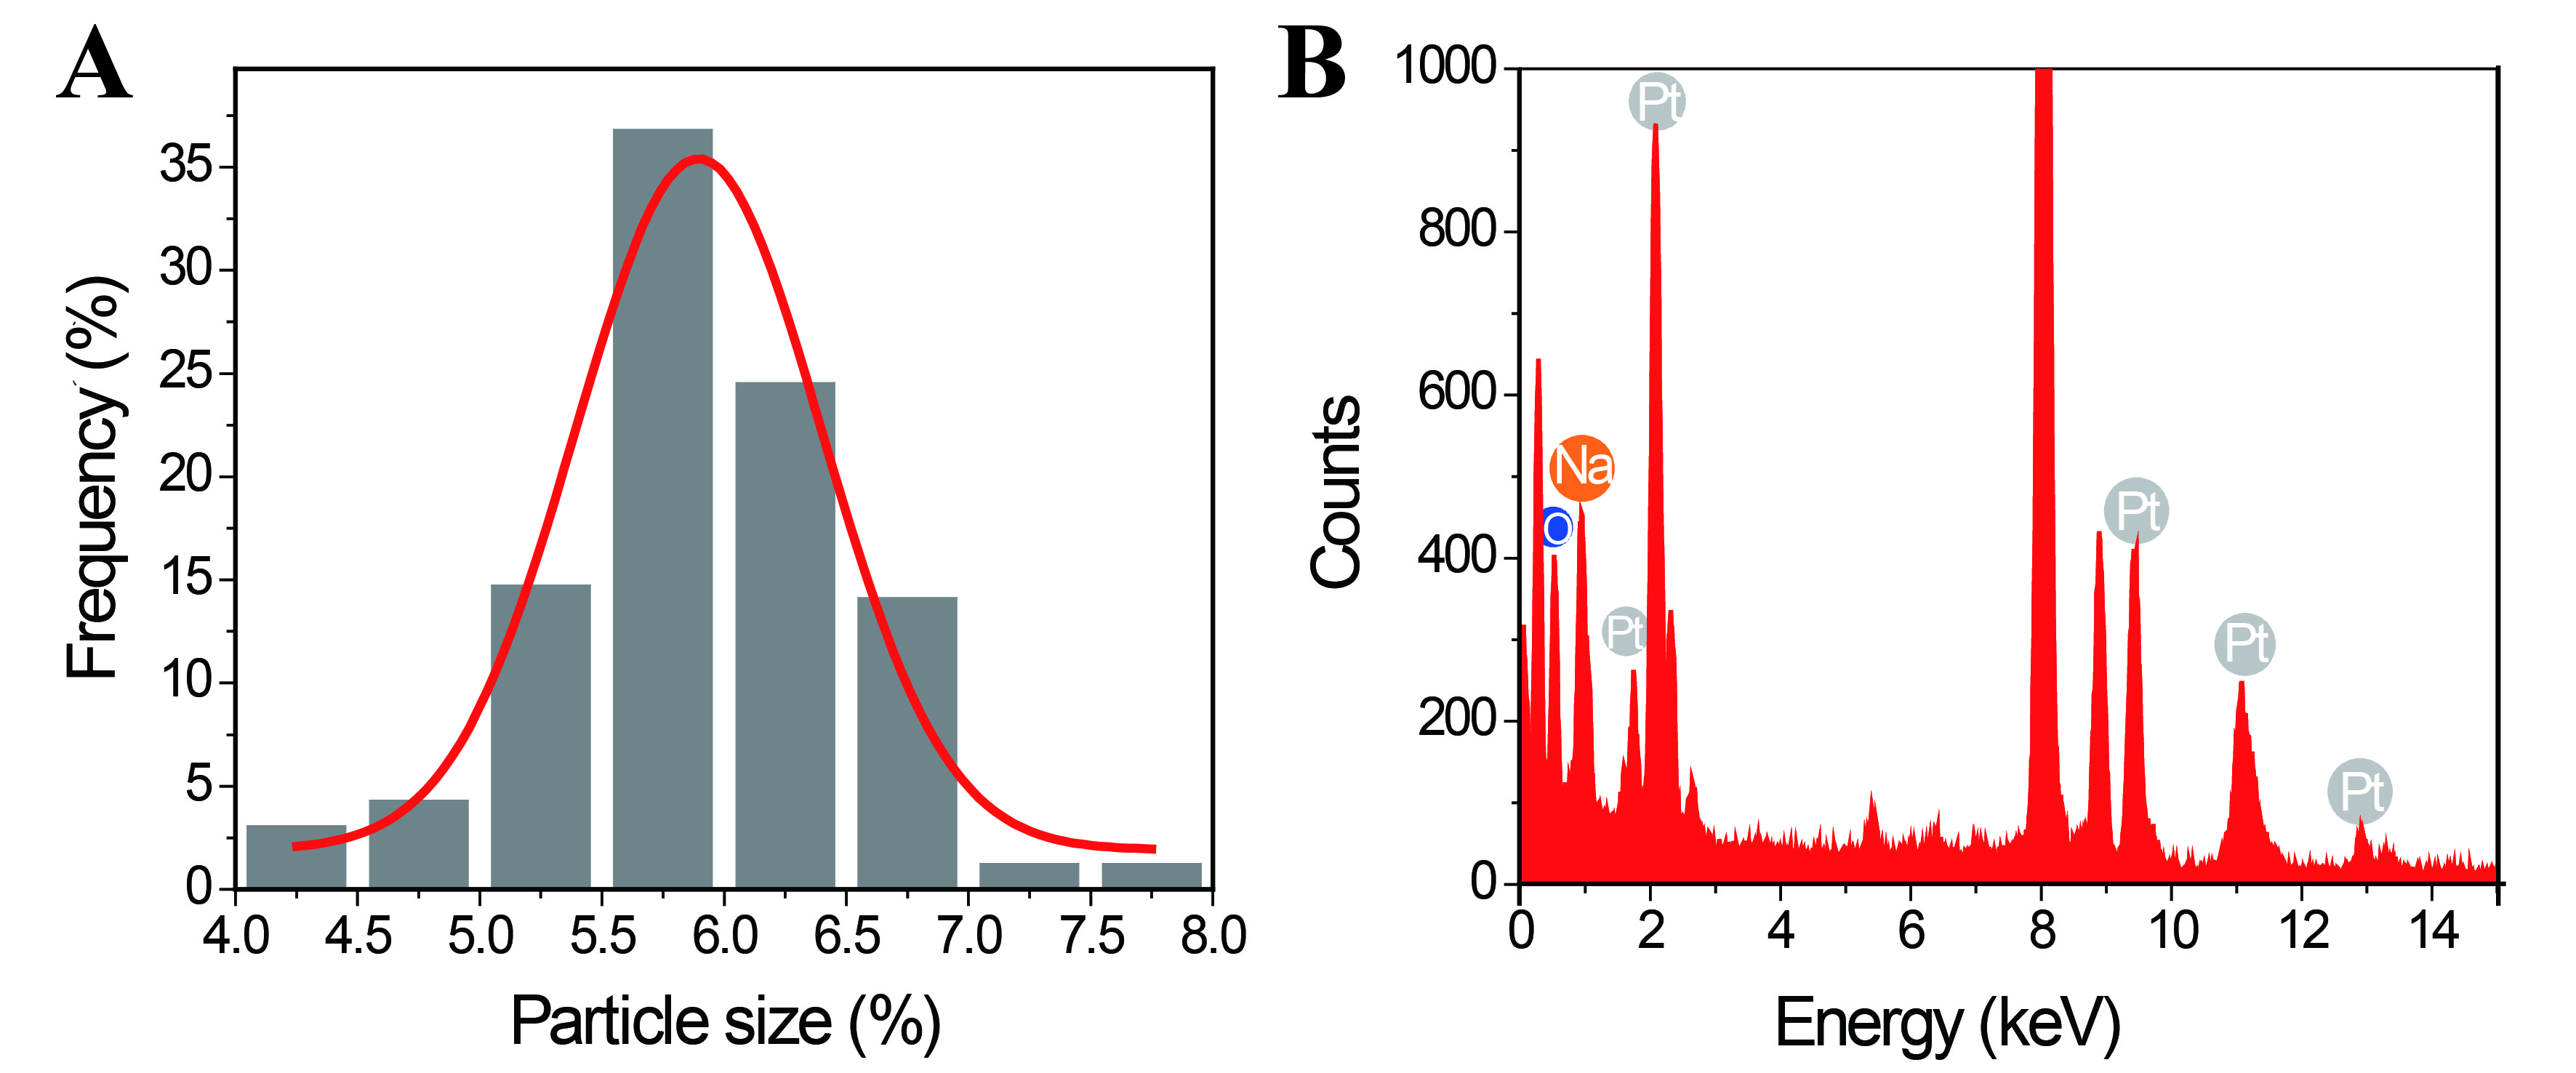


**SUPPLEMENTARY FIGURE S2 | (A)** The size distribution of SA-PtNPs determined from size distribution analysis of 100 random nanoparticles by Gaussian fitting. **(B)** EDS spectrum of SA-PtNPs.


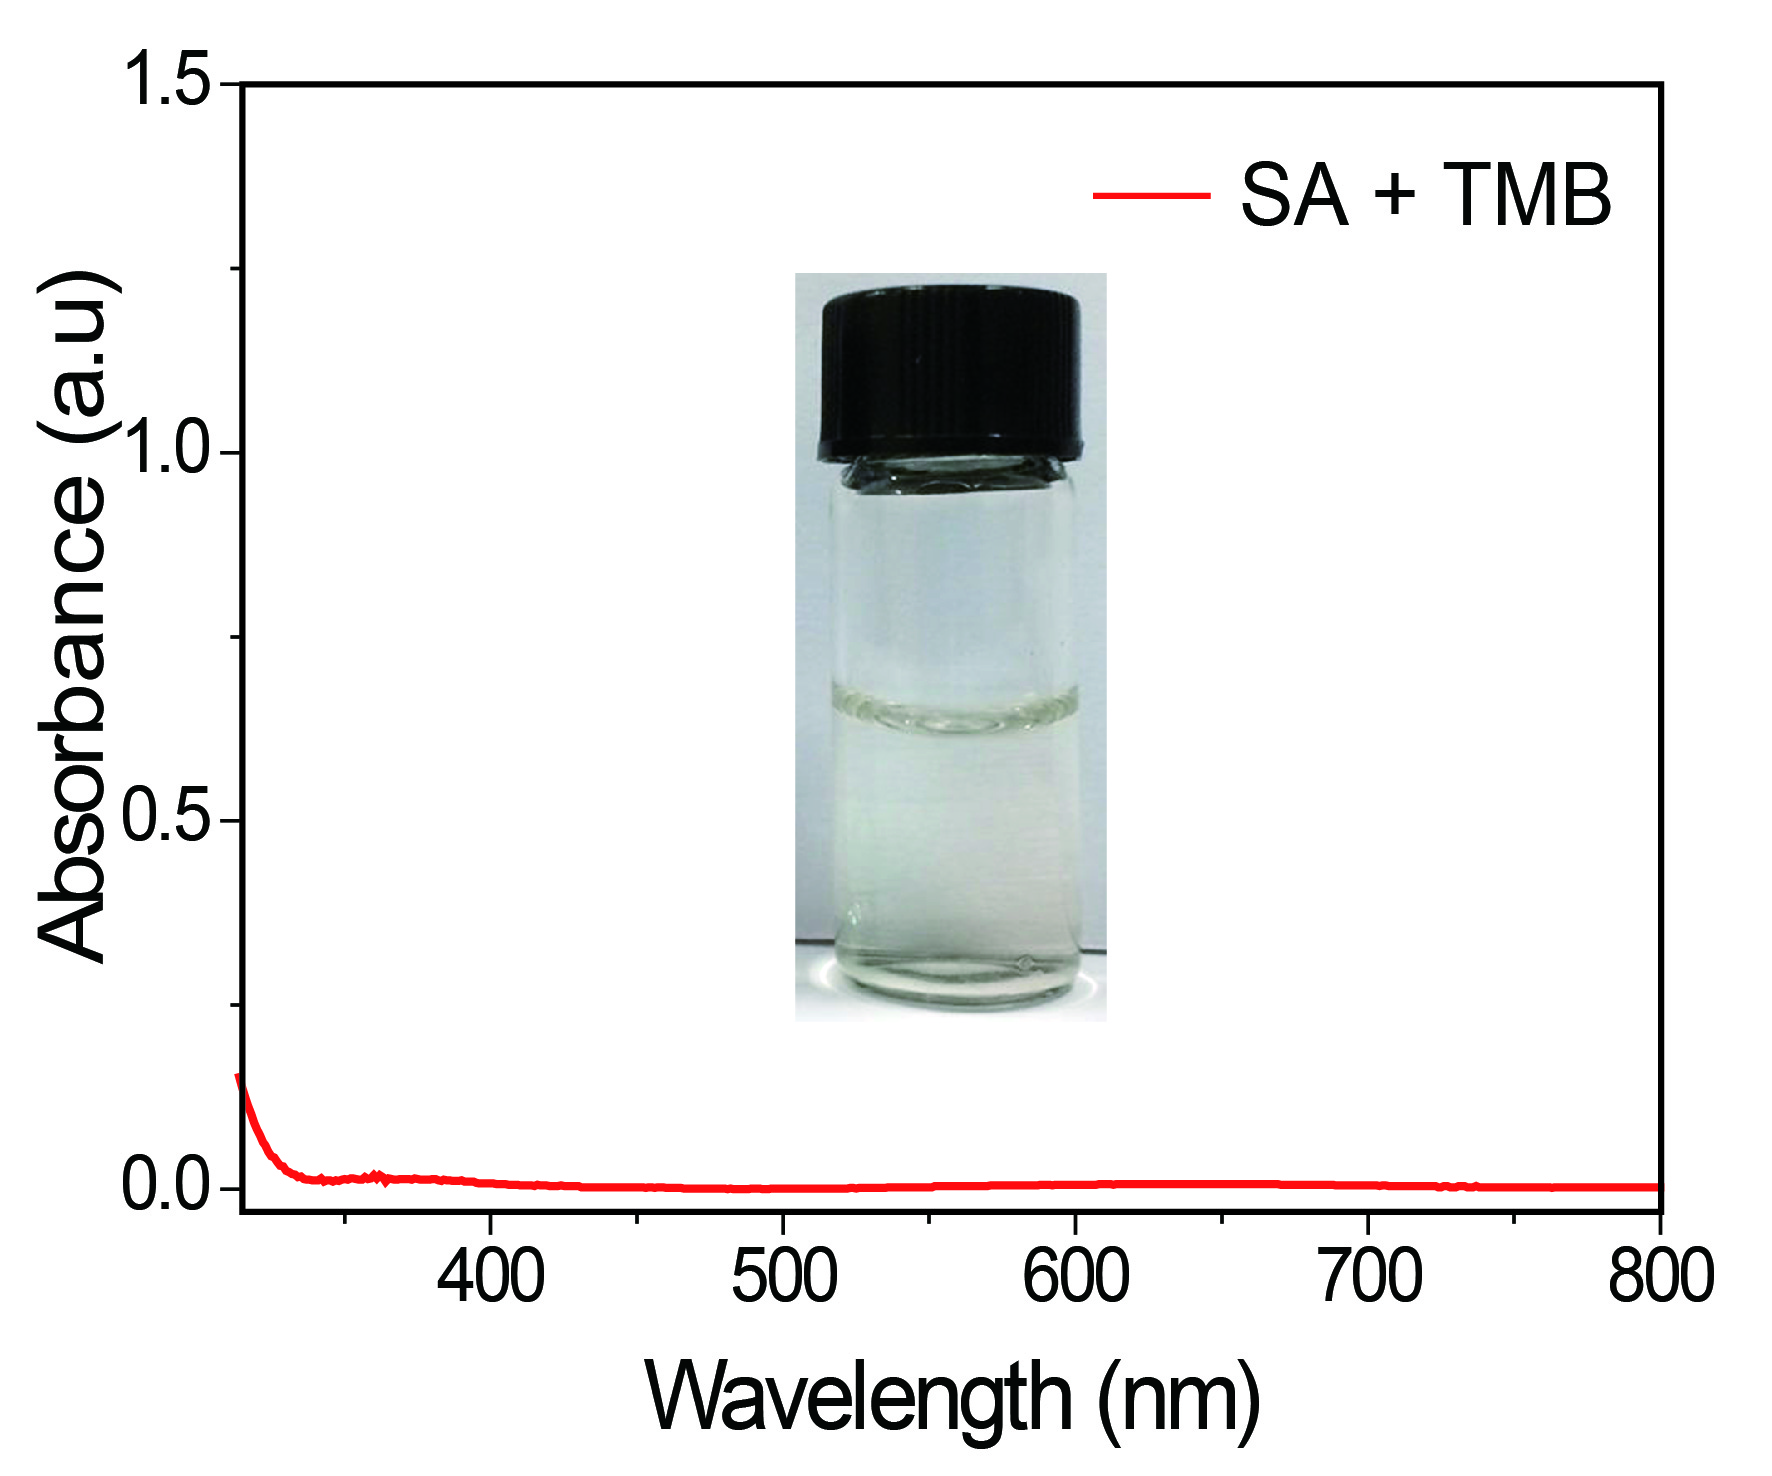


**SUPPLEMENTARY FIGURE S3 |** UV/vis spectra of TMB+SA.


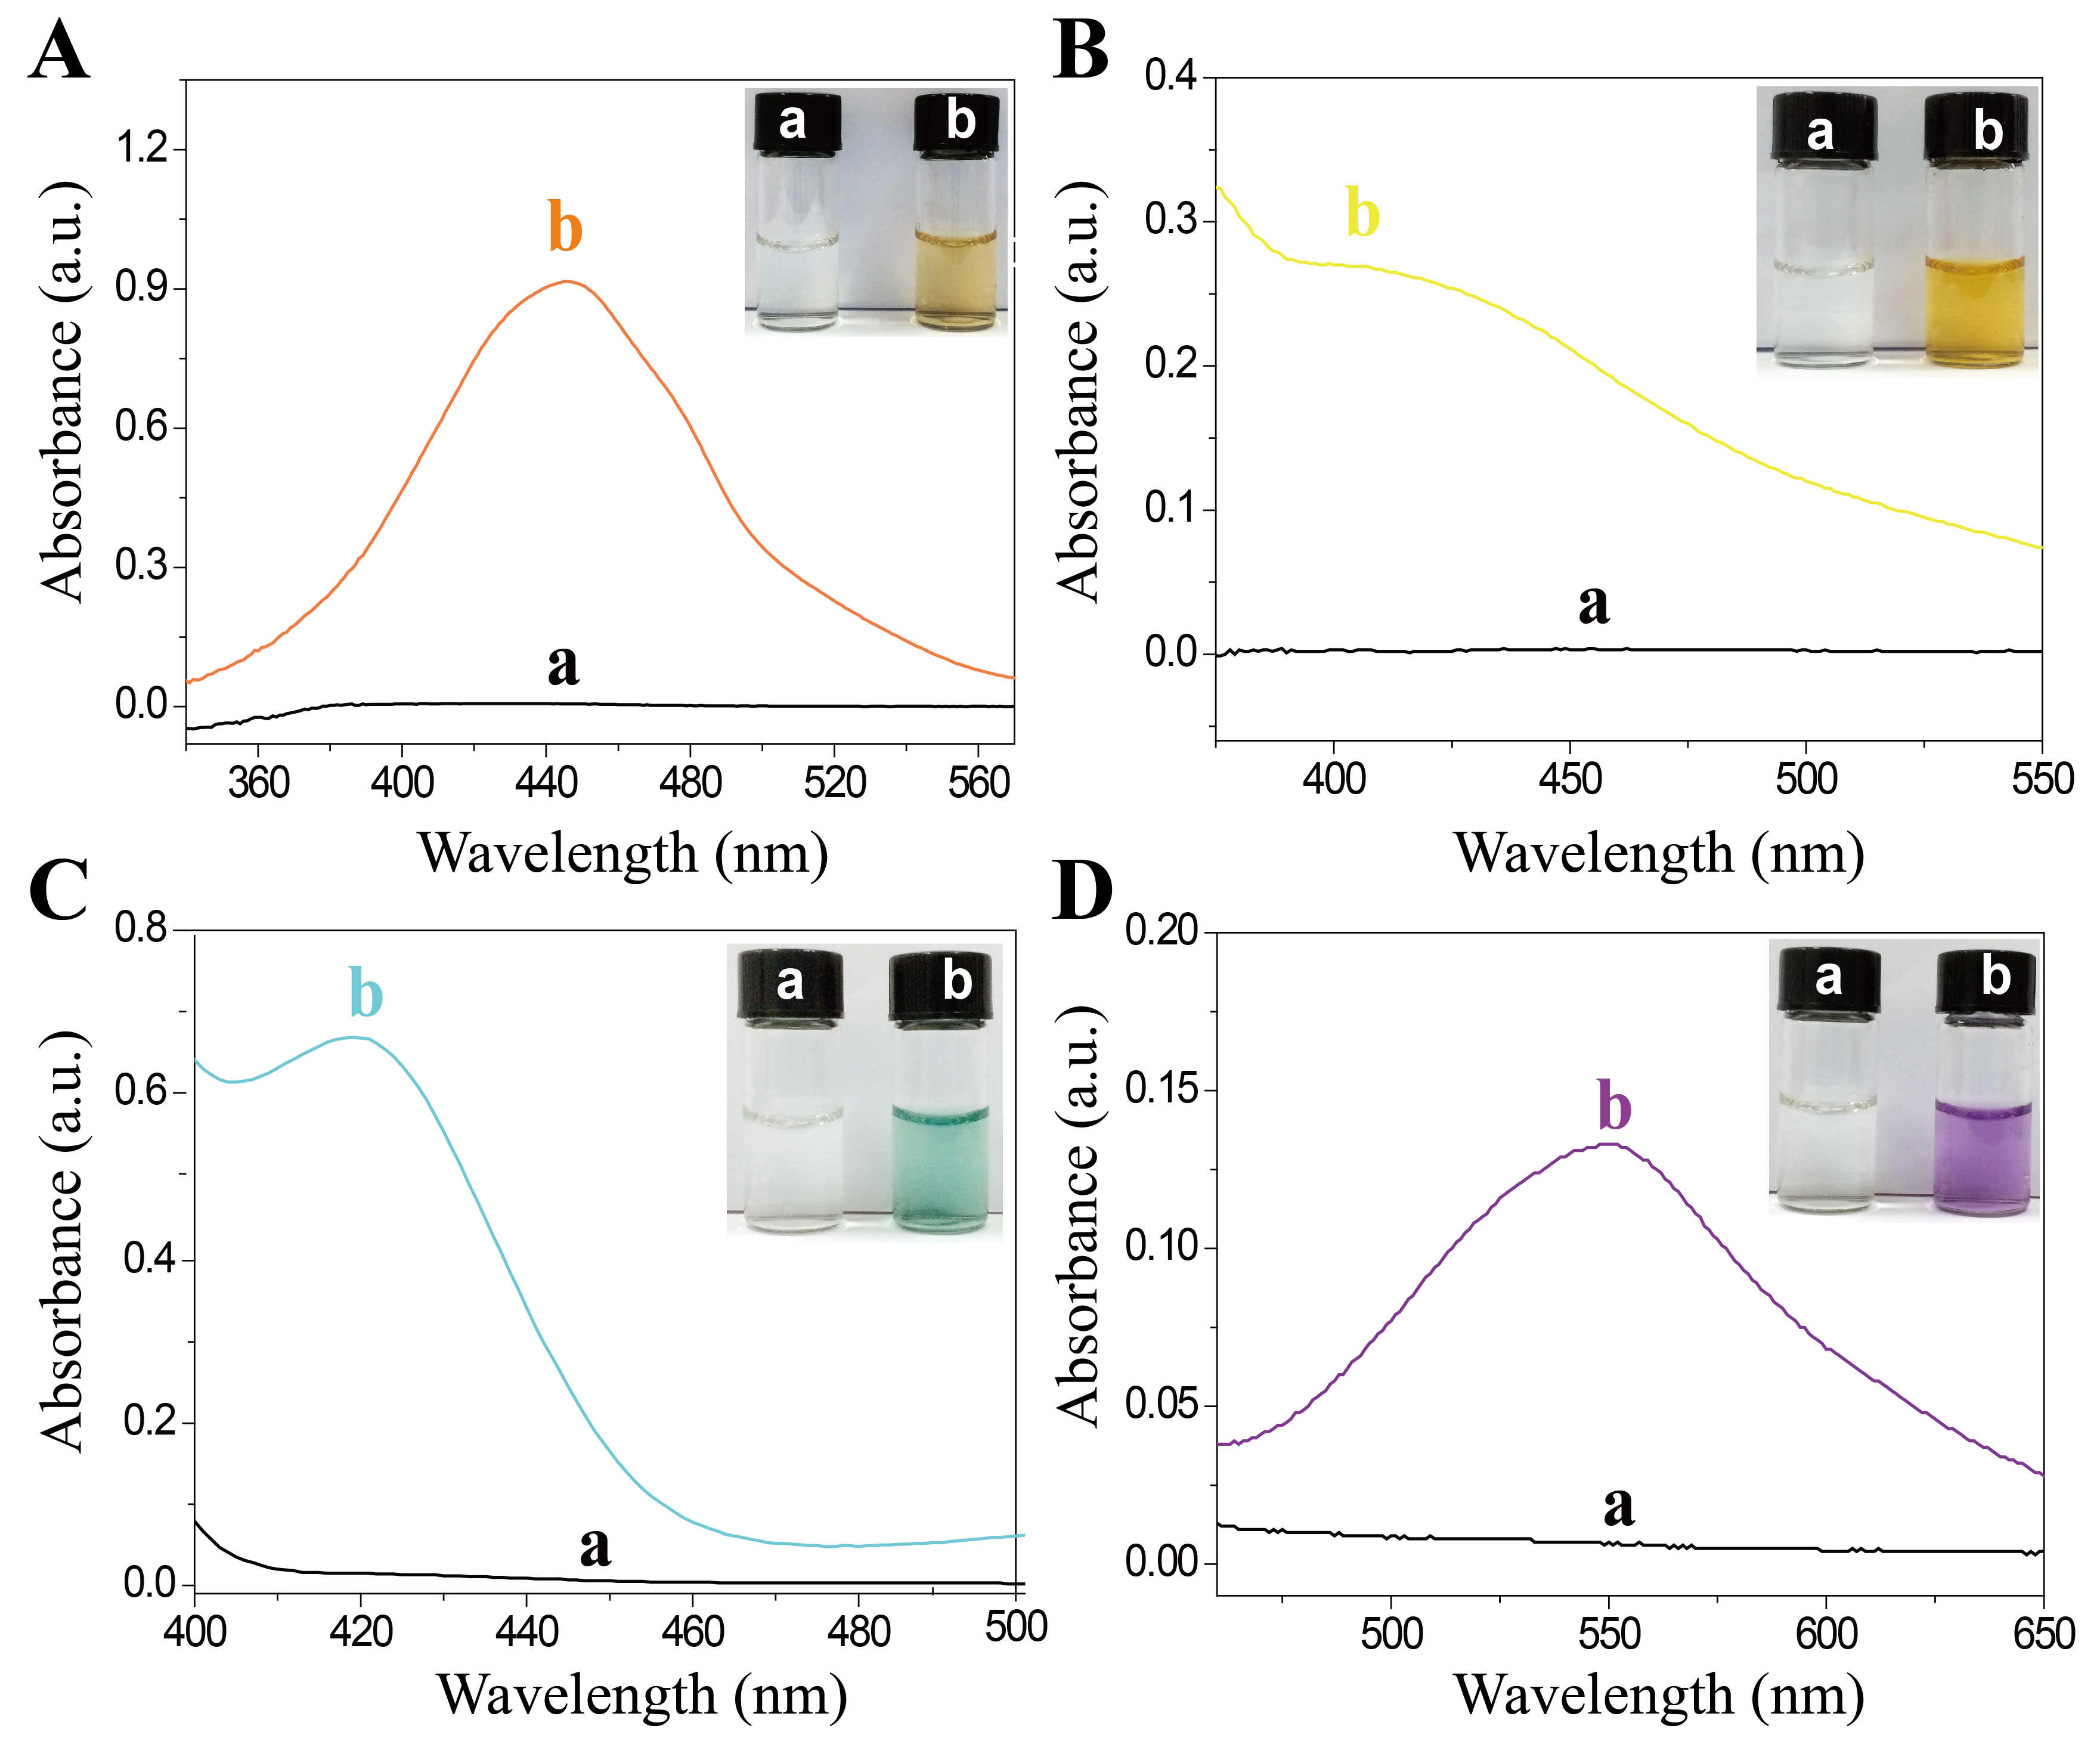


**SUPPLEMENTARY FIGURE S4 |** UV-vis spectra of **(A)** OPD, **(B)** pyrogallol, **(C)** ABTS, and **(D)** 4AAP/TOPS catalyzed by SA-PtNPs: **(a)** substrate only, **(b)** substrate + SA-PtNPs. Inset: the corresponding images.


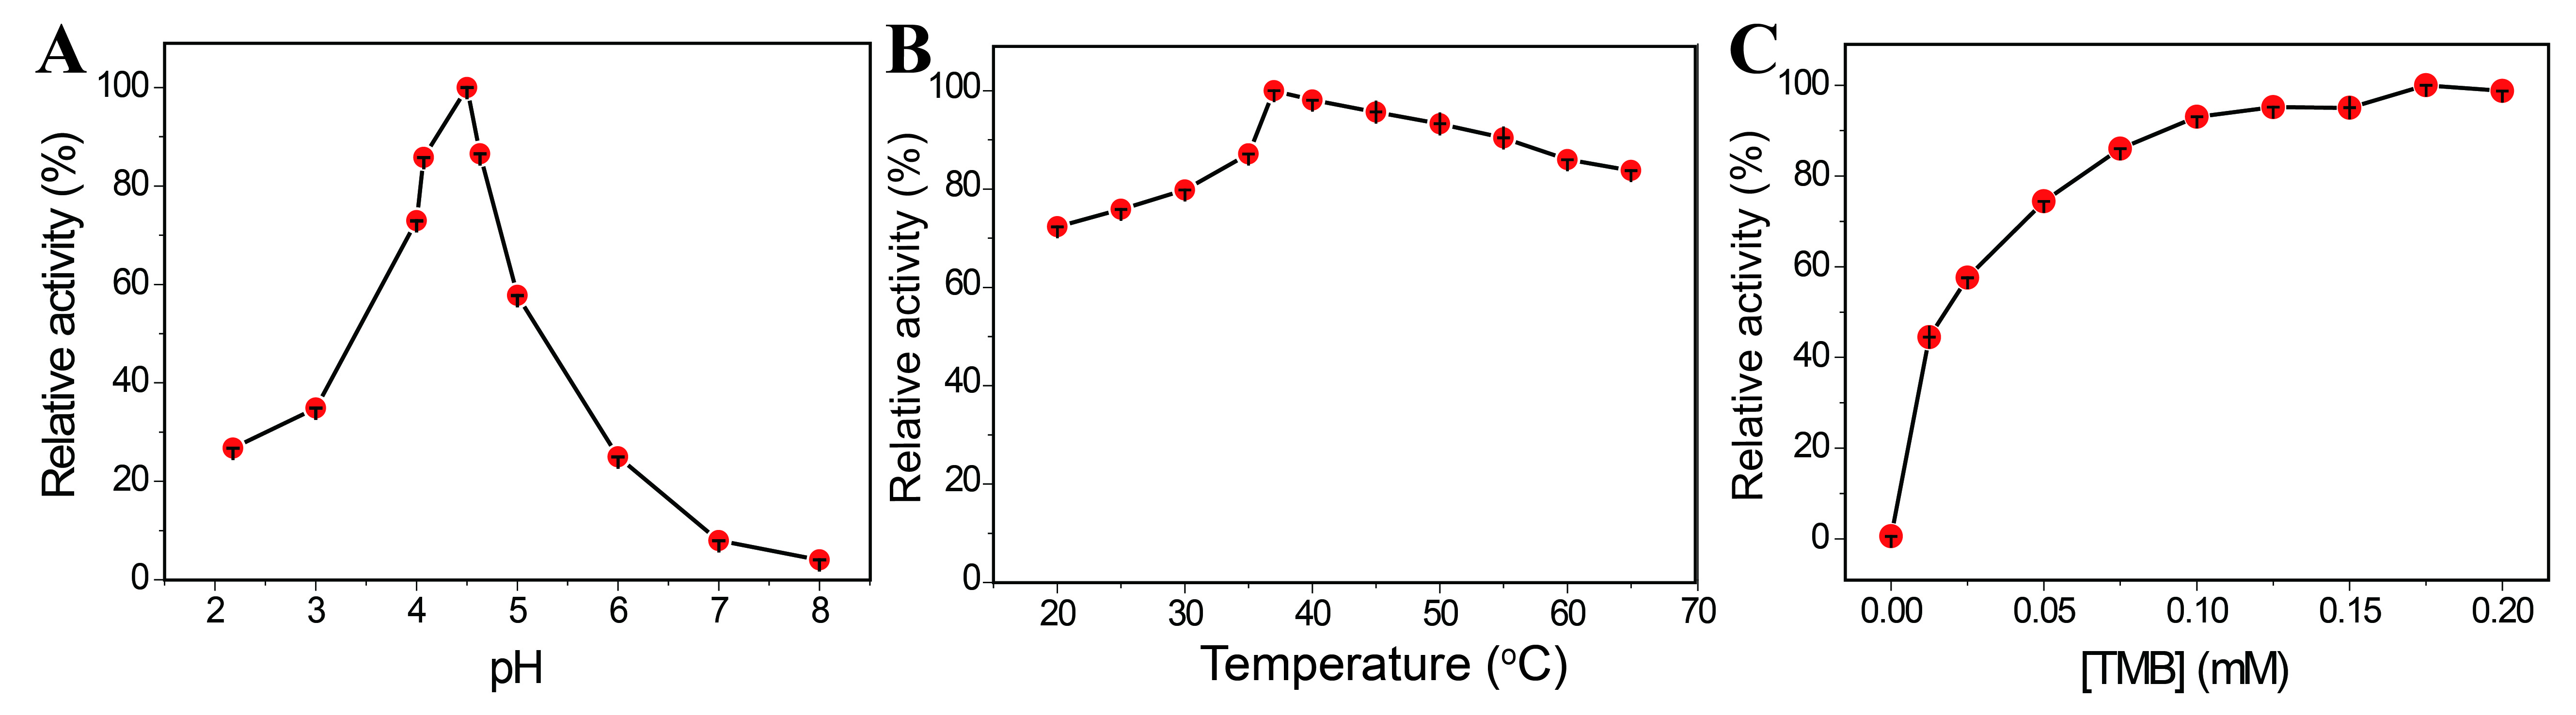


**SUPPLEMENTARY FIGURE S5 |** The optimization of SA-PtNPs-TMB reaction including **(A)** pH, **(B)** temperature optimization, **(C)** TMB concentration. (The highest point was defined as 100% relative activity)


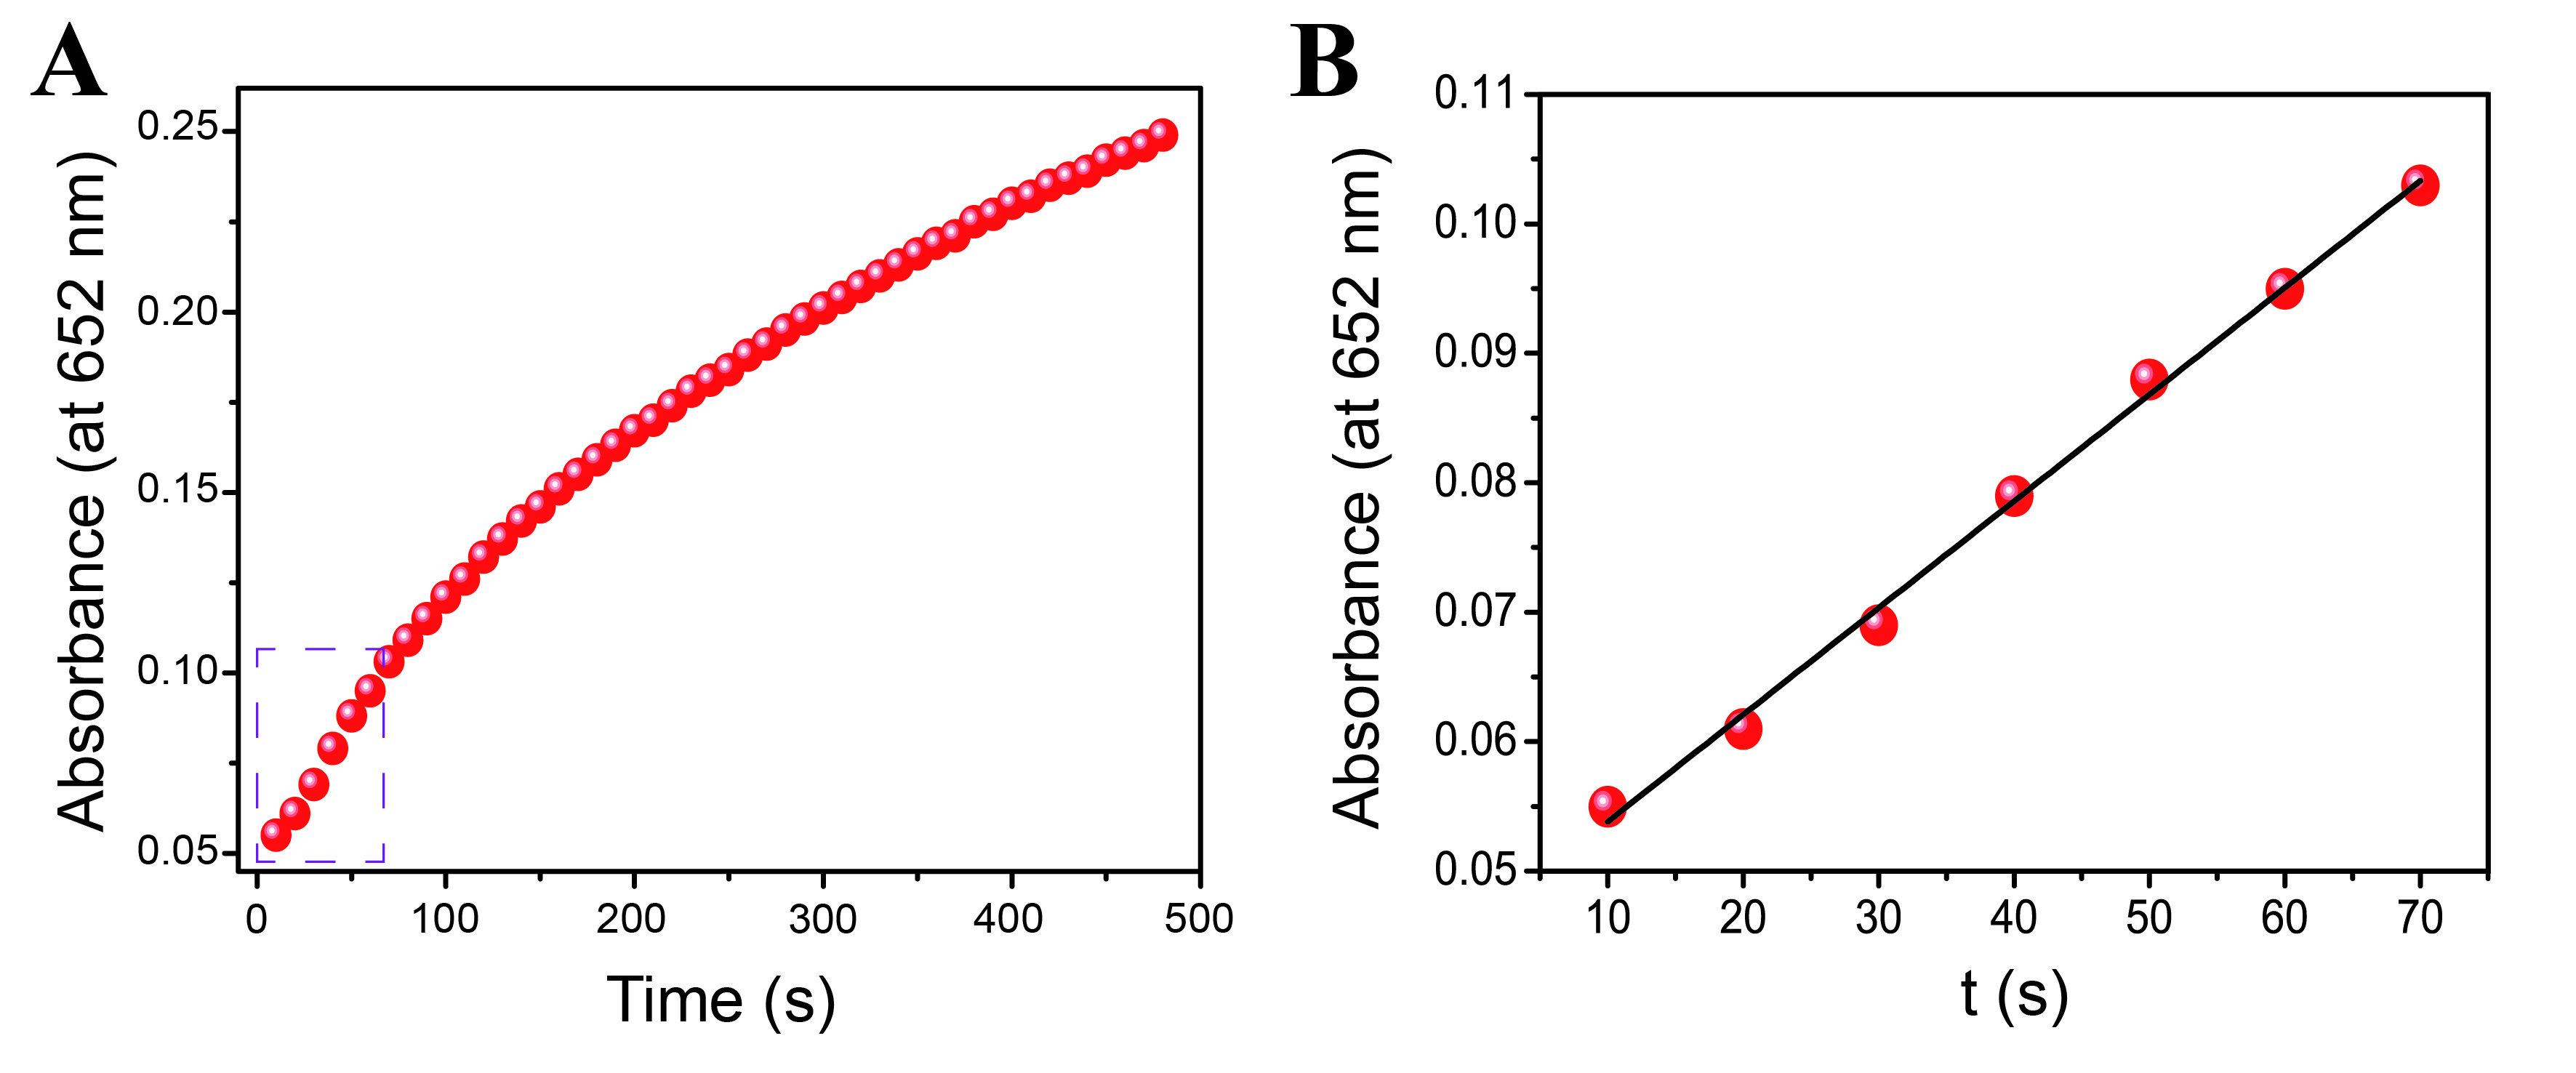


**SUPPLEMENTARY FIGURE S6 | (A)** Standardization of oxidase-like activity of SA-PtNPs; **(B)** Magnified initial linear portion of the reaction time curves. A time length of 70 s was chosen for the initial rate period because the coefficients were close to 1 after a linear regression analysis. (One unit is defined as the amount of nanozyme that catalyzes 1 μmol of product at 25 oC per minute. The specific activity is defined as activity units per gram of nanozyme.)

**Supplementary Figure S6** is the curve of the TMB color reaction catalyzed by SA-PtNPs. First of all, SA-PtNPs (15.61 mg/L) responded with TMB (0.15 mM) at 25 oC. Then, the absorbance of the mixture was measured every 10 s. Reaction-time curves were obtained by plotting the absorbance at 652 nm against the reaction time(see **Supplementary Figure S6A**). The reaction-time curve of the first 70 s in the reaction process was fitted (**Supplementary Figure S6B**). Then, calculate the nanozyme activity (units) using the following equation (Jiang et al., 2018):

*b*nanozyme =

Here, *b*nanozyme represents the catalytic activity unit of nanozyme; V is the total volume of solution (μL); ε is the molar absorption coefficient of the colorimetric substrate TMB; l stands for optical path (cm); ΔA/Δt(a.u./min) represents the rate of change of absorbance with time. (V = 1000 μL, εTMB = 39000 M-1cm-1, l = 1 cm, ΔA/Δt = 8.25 × 10-4 a.u./s）

So, *b*nanozyme = 1000/39000 × (8.25× 10-4/60) = 1.269 × 10-3 U.

The specific activity (SA) is defined as activity units per gram of nanozyme here. SASA-PtNPs=*b*nanozyme/mnanozyme = 1.269 × 10-3 U / (15.61 mg/L× 30 μL) = 2711 U/g.


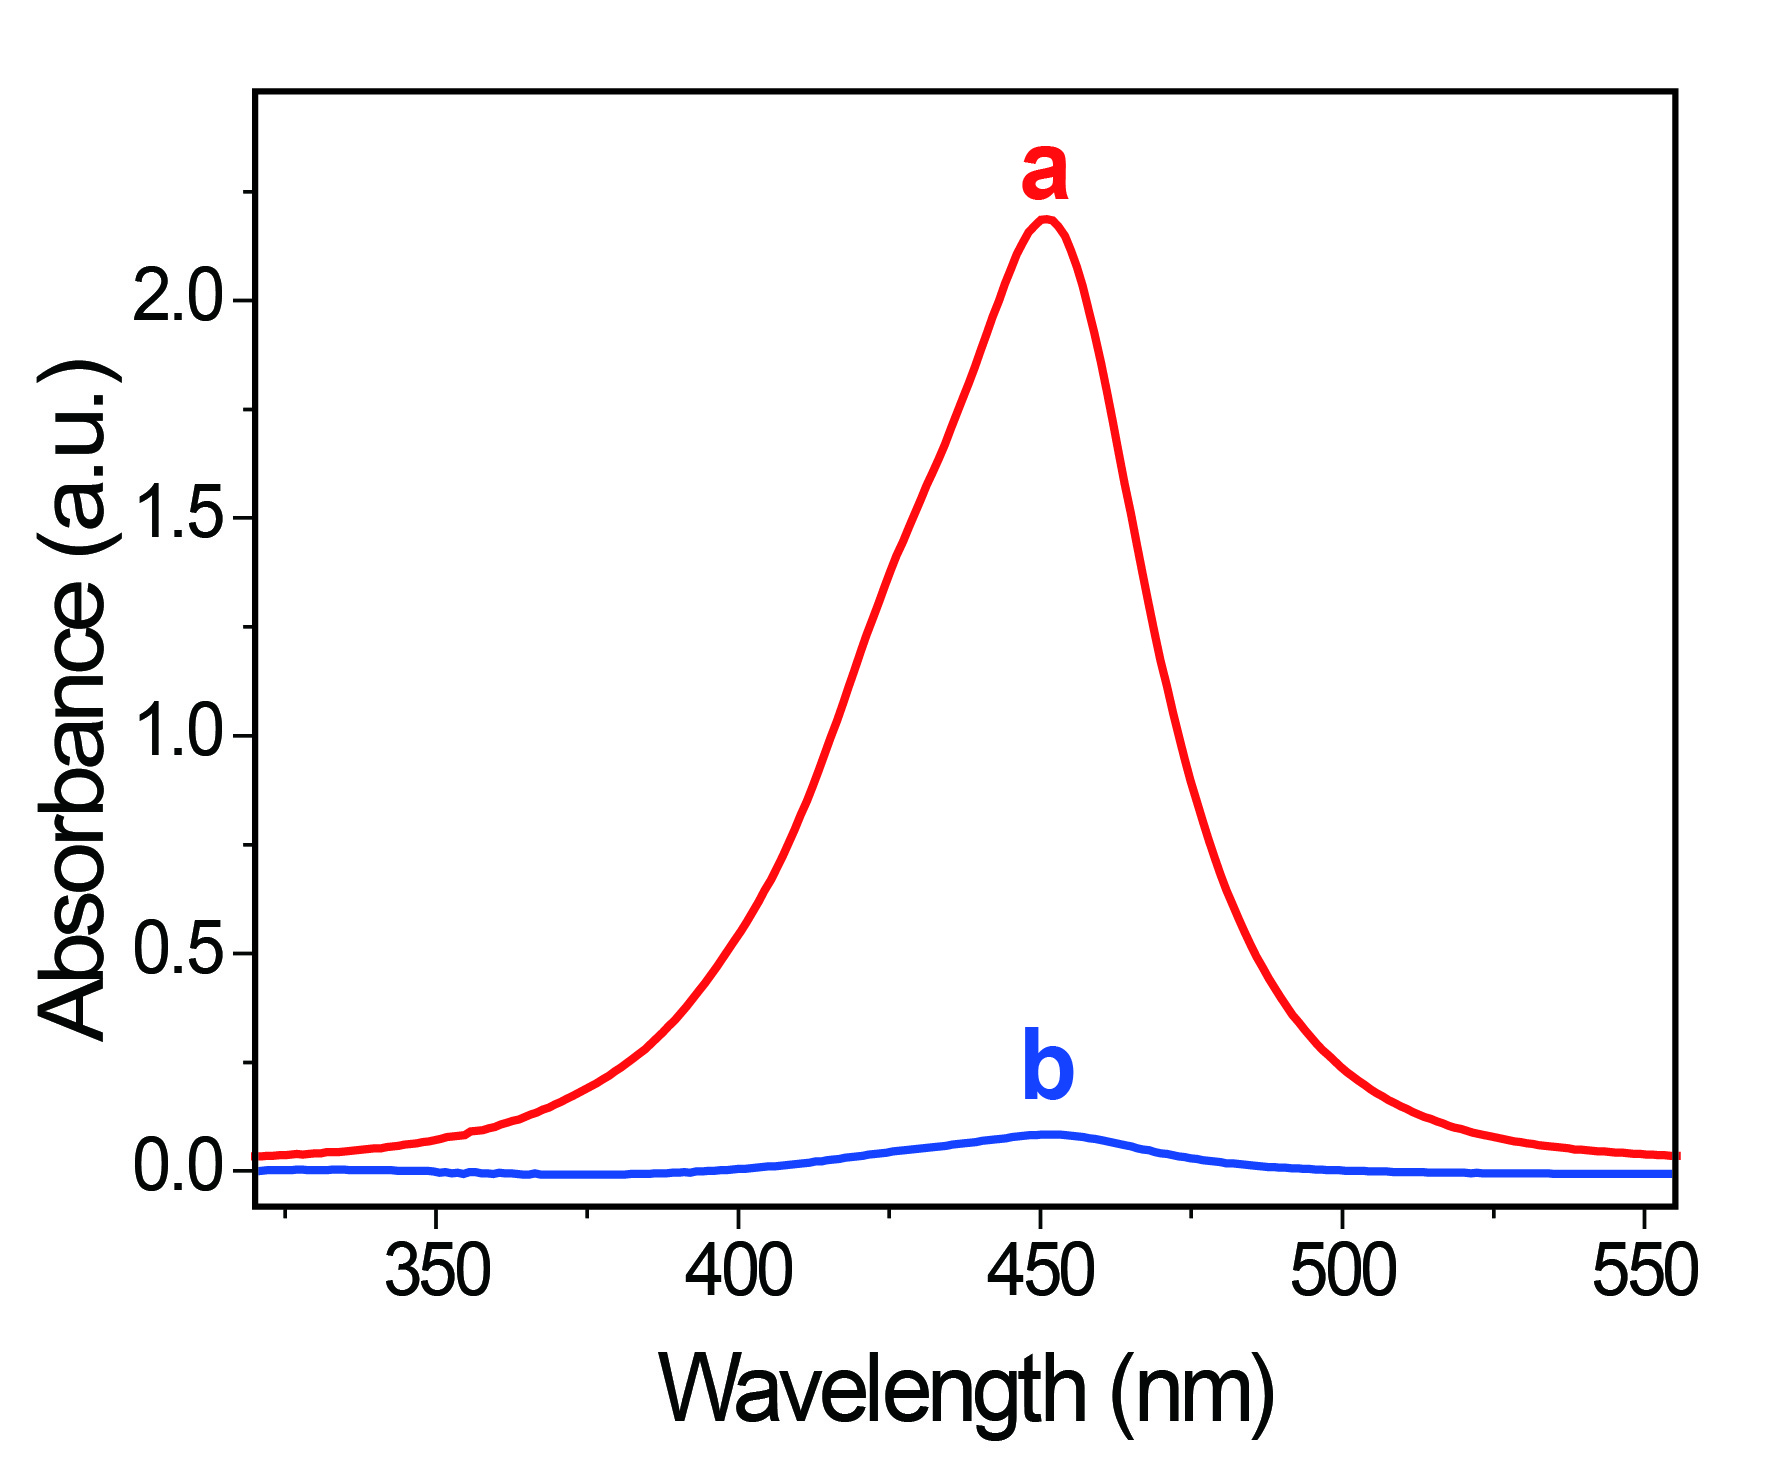


**SUPPLEMENTARY FIGURE S7 |** SA-PtNPs-catalyzed TMB oxidation was conducted in air with (a) dissolved oxygen and (b) after the reaction mixture was bubbled with highly pure nitrogen gas for 10 min.

**A B**


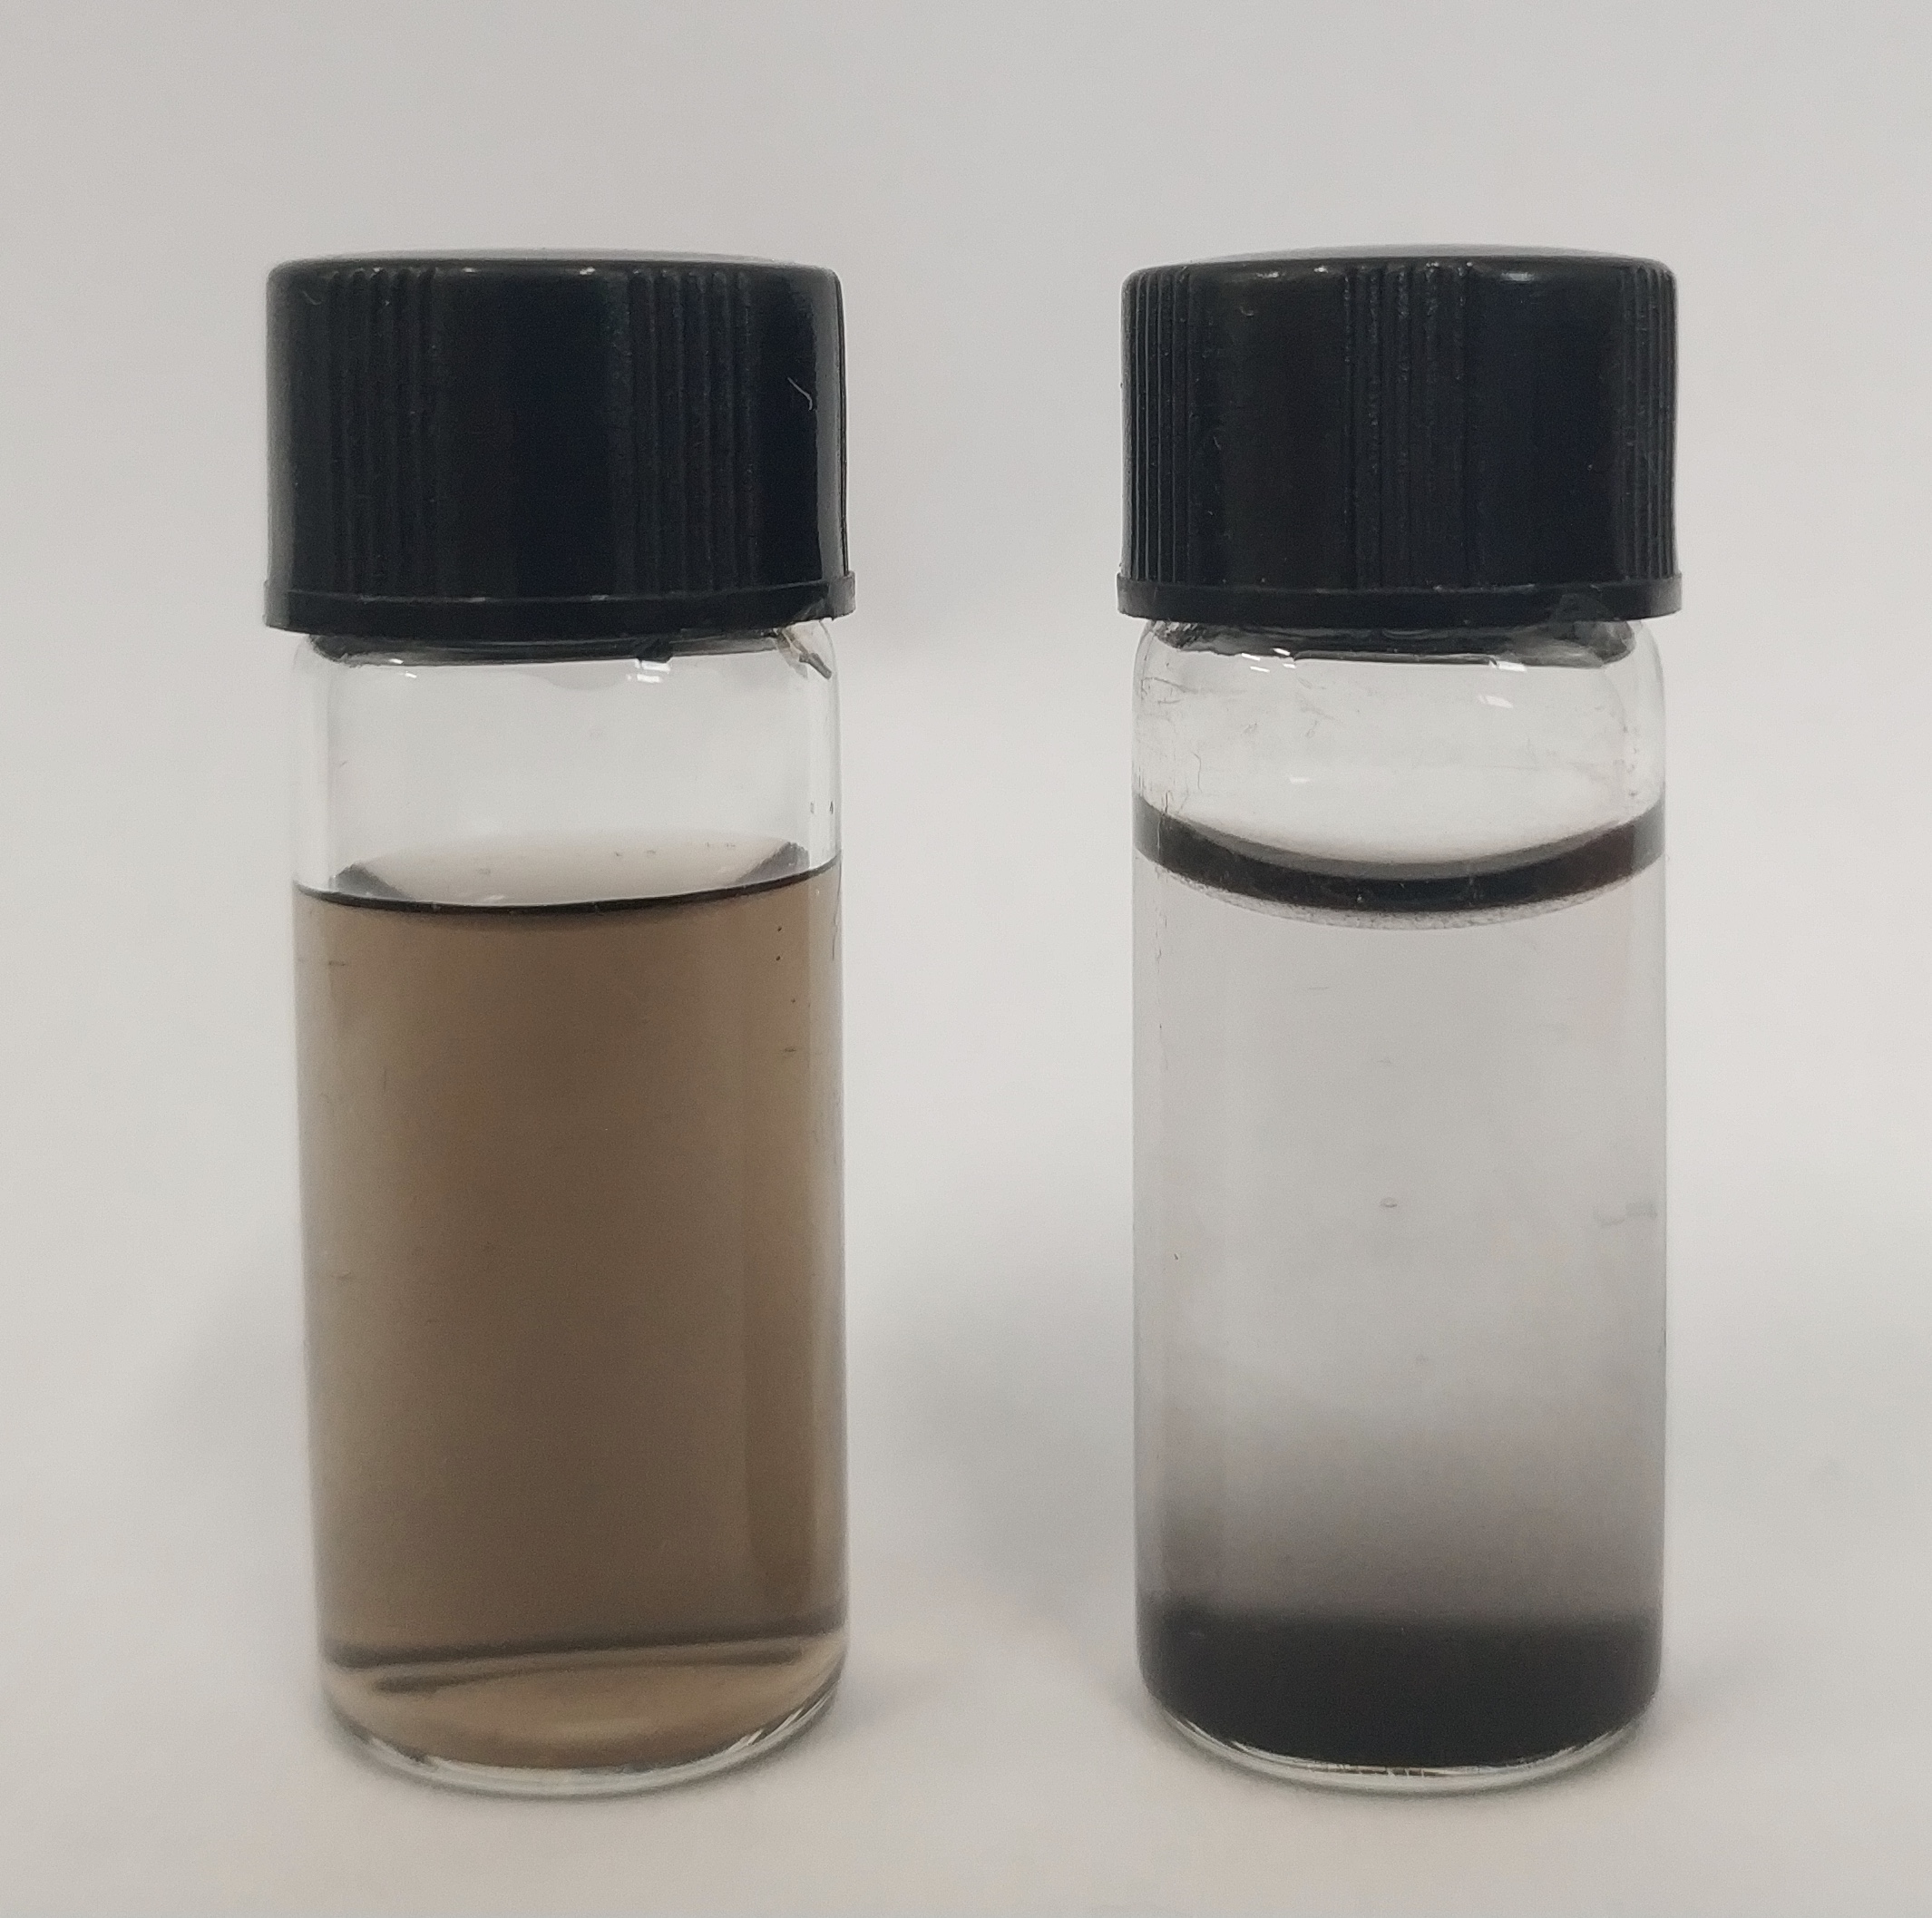


**SUPPLEMENTARY FIGURE S8 |** Photographs of (A) SA-PtNPs and (B) bare PtNPs. (The synthesis steps of bare PtNPs are as follows: 2 mL H2PtCl6 (10 mM) was mixed with of 1% (v/v) acetic acid solution. The mixture was vortex at ambient temperature for 30 min. 1 mL of [newly-prepared](http://dict.cnki.net/javascript:showjdsw('showjd_2','j_2')) NaBH4 solution (70 mM) was added to the mixture and was completed within 5 min. The bare PtNPs were obtained by stirring in the dark for 90 min. )

**SUPPLEMENTARY TABLE S1 |** Comparison of reported methods for probing proanthocyanidins.

| **Methods** | **Linear range (mg/L)** | **LOD (mg/L)** | **Ref.** |
| --- | --- | --- | --- |
| thiolysis HPLC | 50-100 | 17 | Gao et al., 2018 |
| HPLC-ESI-QTOF-MS | 0.39-6.25 | 0.096 | Cádiz-Gurrea et al., 2017 |
| HPLC-DAD-MS/MS | - | 0.00476 | García-Estévez et al., 2017 |
| HPLC-DAD-MS | - | 0.17 | Gris et al., 2011 |
| Spectrophotometry  (MW=468.42) | 1.87-15.22 | 0.937 | This work |
| 4-32.5 μM | 2.0 μM |

**REFERENCE**

Cádiz-Gurrea, M.D.L.L., Borrás-Linares, I., Lozano-Sánchez, J., Joven, J., Fernández-Arroyo, S., and Segura-Carretero, A. (2017) Cocoa and grape seed byproducts as a source of antioxidant and anti-Inflammatory proanthocyanidins. *Int. J. Mol. Sci.* 18, 376-389. doi: 10.3390/ijms18020376

Gao, C., Cunningham, D.G., Liu, H., Khoo C., and Gu L. (2018) Development of a thiolysis HPLC method for the analysis of procyanidins in cranberry products. *J. Agr. Food Chem.* 66, 2159-2167. doi: 10.1021/acs.jafc.7b04625

García-Estévez, I., Alcalde-Eon, C., and Escribano-Bailon, M.T., (2017) Flavanol quantification of grapes via multiple reaction monitoring mass spectrometry. application to differentiation among clones of vitis vinifera l. cv. rufete grapes. *J. Agr. Food Chem.* 65, 6359-6368. doi: 10.1021/acs.jafc.6b05278

Gris, E.F., Mattivi, F., Ferreira, E.A., Vrhovsek, U., Pedrosa, R.C., and Bordignon-Luiz M.T. (2017) Proanthocyanidin profile and antioxidant capacity of Brazilian Vitis vinifera red wines. [*Food Chem.*](http://xueshu.baidu.com/usercenter/data/journal?cmd=jump&tn=SE_baiduxueshu_c1gjeupa&ie=utf-8&sc_f_para=sc_hilight=publish&sort=sc_cited&wd=journaluri:(482e10c41cb246dc)%20Food%20Chemistry) 126 p.213-220. doi: 10.1016/j.foodchem.2010.10.102

Jiang, B., Duan, D., Gao, L., Zhou, M., Fan, K., Tang, Y., et al. (2018) Standardized assays for determining the catalytic activity and kinetics of peroxidase-like nanozymes. *Nat. Protoc.* 13, 1506-1520. doi: 10.1038/s41596-018-0001-1
